# Supplementary material for: Bisulfite-Converted DNA Quantity Evaluation: A Multiplex Quantitative Real-Time PCR System for Evaluation of Bisulfite Conversion
Source: Front Genet. 2021 Feb 25;12:618955. doi: 10.3389/fgene.2021.618955 (PMC7947210; doi:10.3389/fgene.2021.618955)
Supplement: Supplementary file 10 [file Table_6.XLSX]

## Sheet: Sheet5
										ID	Status	Ct value					Amount (ng)			Features
	Standard Curve and Basic Formulae											Short-C	Short-T	T -*-> C	Long-Cfree	IPC	C	T	Long	Conversion efficiency (%)	Short/Long	Degradation level	Recovery (%)
										A	gDNA	22.4256			23.7379	27.0539	4.4214		4.73118		0.934524
										A_T-EJ	BS-DNA	28.7345	25.537	24.3243	26.1748	27.2416	0.0438149	1.10273	0.761985	96.1785	1.50469	1.61011	51.8636
										B	gDNA	22.4375			23.9232	27.1314	4.38314		4.11807		1.06437
										B_N-NE	BS-DNA	30.352	29.1222	27.8088	28.8038	27.6262	0.013422	0.0862302	0.106255	86.5312	0.937858	0.88114	9.09414
			Std curve	slope	y-intercept	r-squared
			Short-C	-2.2005	24.458	0.9985
			Long-Cfree	-2.1478	25.812	0.9982
			T-*->C	slope	y-intercept	r-squared
				0.9719	-0.4951	0.9962
